# Supplementary material
Source: publisher figshare collection journal article supplement (https://acs.figshare.com/ndownloader/files/26016680)
Supplement: Supplementary file 1 [file 26016680]

# SUPPORTING INFORMATION

## Challenges detecting lead in drinking water using at-home test kits

Rebecca Kriss,<sup>1</sup> Kelsey J. Pieper,<sup>2\*</sup> Jeffrey Parks,<sup>1</sup> Marc A. Edwards<sup>1\*</sup>

<sup>1</sup>Virginia Tech, Civil and Environmental Engineering, 418 Durham Hall, Blacksburg, VA 24061

<sup>2</sup>Northeastern University, Civil and Environmental Engineering, 467 Snell Engineering Center, 360 Huntington Avenue, Boston, MA 02115

\*Corresponding author: Kelsey J. Pieper: k.pieper@northeastern.edu; 367 Snell Engineering Center 360 Huntington Avenue, Boston, MA 02115  
Marc A. Edwards: edwardsm@vt.edu; Address: 407 Durham Hall 1145 Perry Street, Blacksburg, VA 24060

### DESCRIPTION OF SUPPORTING INFORMATION

Section S1. User confidence in reading at-home lead measurements

Section S2. Characterization of particle composition and lead content

Figure S1. Selection of test kits for analysis

Figure S2. Example of the test kits analyzed

Figure S3. Representative images of particles determined with Raman atomic force microscopy

Figure S4. Lead detection rate for binary test in Phase 1

Figure S5. Color change on the tile of a color strip when in contact with a lead solder particle

Table S1. Lead particle sources and characterization of lead content

Table S2. Metals and phosphorous analysis for samples and blanks for particulate testing in Phases 3 and 4

Table S3: Characterization from one sample of finished drinking water from the Kankakee River

Table S4: Metals and phosphorous analysis for samples and blanks in Phases 1 and 2

Table S5. Lead measurements reported by participants for test kits during Phase 1

Table S6. Size distributions of lead particles determined with Raman atomic force microscopy at a 40x zoom.

Table S7. Size distributions of lead particles determined with Raman atomic force microscopy at a 4x zoom.

Table S8. Particulate lead detection and dissolution when exposed to various corrosion control treatments

Table S9. Metals and phosphorous analysis for samples and blanks in Phase 5

Table S10. Accuracy, sensitivity, and specificity of binary strips

## Section S1. User confidence in reading at-home lead measurements

For Phase 1, participants measured lead in water and recorded their confidence in their measurement when using the 16 test kit brands. Confidence values ranged from a score of one (“Not at all confident”) to five (“Extremely confident”) (Table A). Confidence was generally lower for the color-based tests, which required matching the sample or tile color to a color-gradient scale ranging from light yellow to red. The vial test (one brand) and one of the color strips had median confidence scores of 1 (n=6 participants), while the other color strips (10 brands) had median confidence scores of 2.5-3 (n=5-6 participants). The large intervals between lead measurements (i.e., non-uniform increments of 20-300 mg/L) likely made accurate measurement challenging, since the 150 ug/L concentration represents <1% of the measurement increments. Binary tests had the highest confidence ratings, likely because lead presence was indicated either by a distinct binary color change from white to red or the appearance of indicator lines. The binary tests (three brands) had median confidence ratings of 3-3.5 and the binary color test (one brand) had a median rating of 4 (n=5-6 participants).

Table A. User confidence in reading at-home measurements

| Test Kit | Min | Median | Max |
|----------|-----|--------|-----|
| B1       | 1   | 3      | 4   |
| B2       | 2   | 3.5    | 5   |
| B3       | 3   | 3.5    | 4   |
| V        | 1   | 1      | 4   |
| BC       | 2   | 4      | 5   |
| C1       | 1   | 1      | 4   |
| C2       | 1   | 2.5    | 3   |
| C3       | 2   | 3      | 3   |
| C4       | 1   | 3      | 3   |
| C5       | 2   | 3      | 3   |
| C6       | 2   | 3      | 4   |
| C7       | 1   | 3      | 4   |
| C8       | 1   | 3      | 4   |
| C9       | 2   | 3      | 4   |
| C10      | 2   | 3      | 4   |
| C11      | 2   | 3      | 4   |

User confidence was reported from 5-6 participants for each test kit. Test kits include the vial test (V), 11 color strips (C1-C11), the binary color test (BC) and three binary strips (B1-B3).

## Section S2. Characterization of particle composition and lead content

Three to four samples were used to determine the variability in particle composition for particles used in Phases 3 and 4. These samples include a sample suspended in water, a sample dissolved using vinegar, and a sample dissolved using lemon juice for each particle type. An additional particle sample suspended in water was also analyzed for three particle types due to expired test kits. Specifically, kits from one brand of binary kit were expired when received and were not used. Once replacements for these kits were received, a second round of experiments were performed to test these binary strips with the three particle types that had been previously tested with the other two brands of binary strip (Table S2, Round 2).

The total recoverable particle mass was defined as the sum of the masses for the eight metals and phosphorous (Tables S1 and S2) in fully digested samples (also used to determine total lead). Because phosphorous could be present in particles, but was also added to the base water, the total recoverable particle mass was calculated using the difference between sample phosphorous concentrations and the initial dissolved phosphorous concentrations (phosphorous value from the filtered sample with the lowest particle contact time) to differentiate phosphorous in particles from dissolved phosphorous added in the water. The percentage of lead in the total recovered particle mass was calculated as the total lead divided by the total recovered particle mass.

Variability in the percentage of lead in the total recovered particle mass was observed among the different particles, with average lead content ranging from 0.8% to 92% (Table S1). However, variability among replicates (particles from the same source) exhibited much less variability, with standard deviations ranging from 0.3% to 14%. Prior dissolution steps are not expected to affect particle characterization results since samples were analyzed after full digestion using 2% nitric acid and 2% hydroxylamine and heated for at least 1 week. Therefore, samples with and without dissolution steps (lemon juice or vinegar) prior to full digestion were included in the particle composition analysis for particles in Phases 3 and 4.

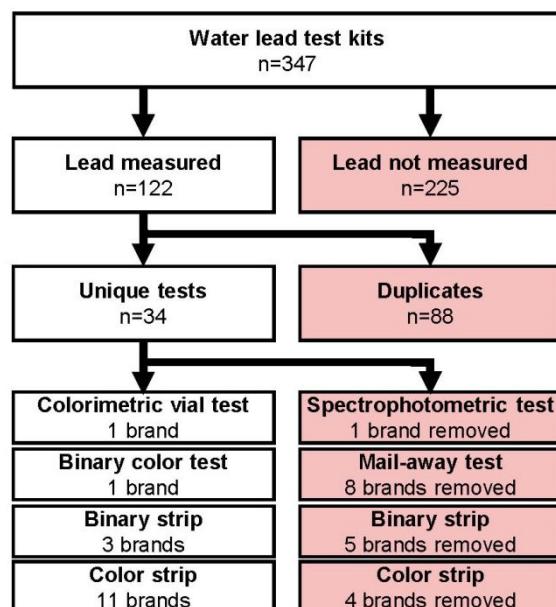

Figure S1. Selection of test kits for analysis. Red boxes indicate test kits that were removed.

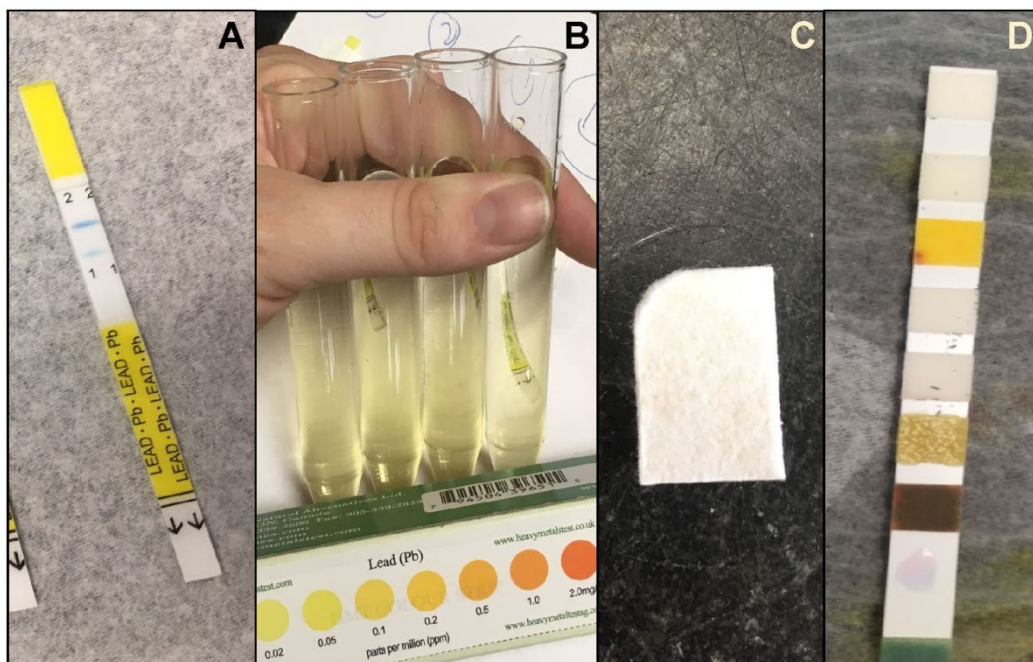

Figure S2. Example of the test kits analyzed (A) binary strip, (B) colorimetric vial test, (C) binary color test, and (D) color strip.

**A**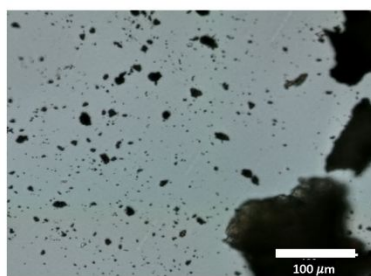**Pb**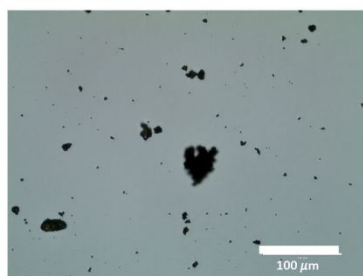**Pb-Sn**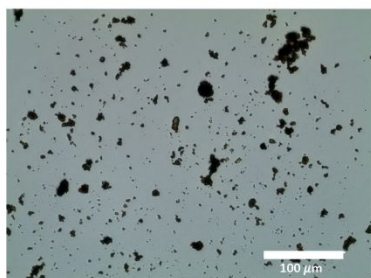**Pb-Fe**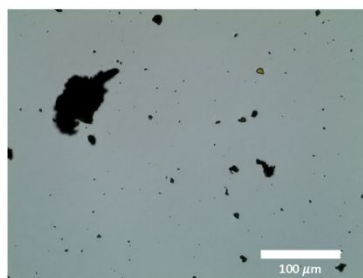**50:50 Pb:Sn Solder****B**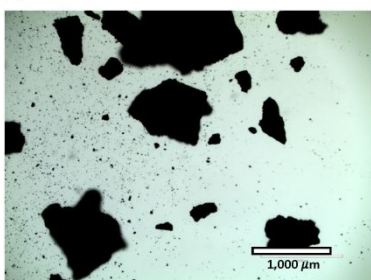**Al-Pb-1**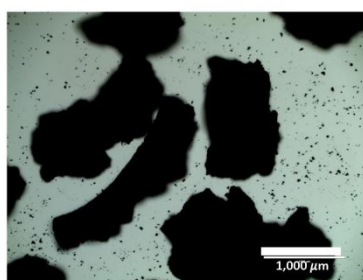**Al-Pb-2**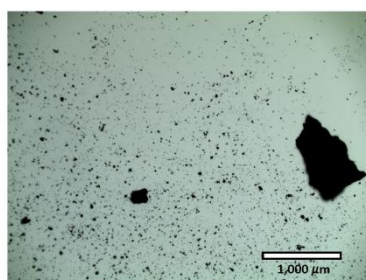**Zn-Fe**

Figure S3. Representative images of particles determined with Raman atomic force microscopy. Images are presented at A) 40x and B) 4x magnifications. Pb: lead; Sn: Tin; Fe: iron; Al: aluminum; Zn: zinc.

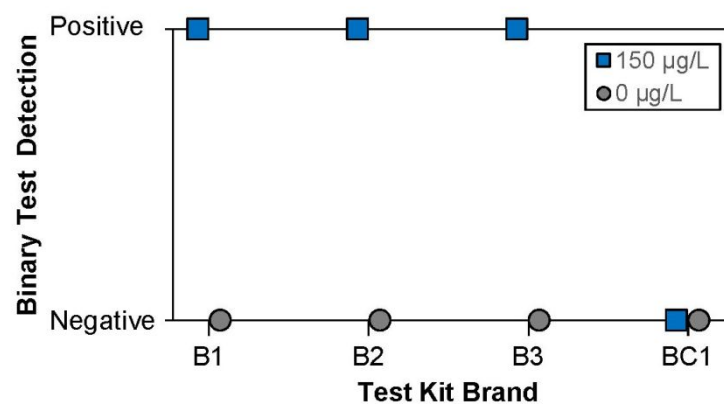

Figure S4. Lead detection rate for binary test in Phase 1 when measuring (1) 150 µg/L dissolved lead (blue squares) and (2) blank (gray circles). Test kits included: 3 binary strips (B1-B3) and 1 binary color test (BC1).

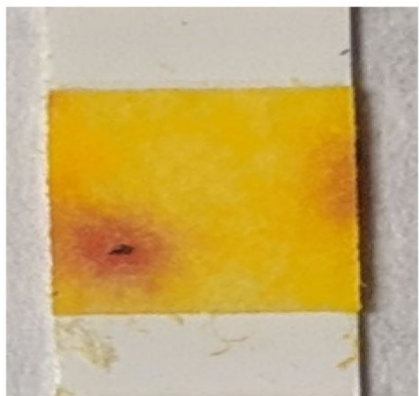

Figure S5. Color change on the tile of a color strip when in contact with a lead solder particle



Table S1. Lead particle sources and characterization of lead content

| Particle type      | Source type          | Source location  | Mean % total recovered particle mass (SD) | % lead of total recovered particle mass |             |      |
|--------------------|----------------------|------------------|-------------------------------------------|-----------------------------------------|-------------|------|
|                    |                      |                  |                                           | Min                                     | Mean (SD)   | Max  |
| Pb                 | Lead pipe            | Laboratory       | 93% (3%)                                  | 92%                                     | 97% (4%)    | 103% |
| Al-Pb-1            | LSL                  | Buffalo, NY      | 39% (4%)                                  | 23%                                     | 26% (3%)    | 30%  |
| Zn-Fe              | Galvanized iron pipe | Flint, MI        | 29% (6%)                                  | 0.8%                                    | 1.2% (0.3%) | 1.4% |
| Pb-Sn              | Lead solder          | Flint, MI        | 47% (18%)                                 | 42%                                     | 58% (14%)   | 70%  |
| Al-Pb-2            | LSL                  | Flint, MI        | 34% (9%)                                  | 9%                                      | 19% (9%)    | 27%  |
| Pb-Fe              | LSL                  | Washington, D.C. | 69% (9%)                                  | 55%                                     | 62% (6%)    | 67%  |
| Fe-PO <sub>4</sub> | Particles in water   | Cicero, IL       | -                                         | 3%                                      | 9% (6%)     | 14%  |

Pb: lead; Al: aluminum; Fe: iron; Zn: zinc; Sn: tin; PO<sub>4</sub>: phosphate; LSL: Lead Service Line; SD: standard deviation

The % of total recovered particle mass could not be calculated for Fe-PO<sub>4</sub> particles because they were collected in water, so the total particle mass added was unknown.

Table S2. Metals and phosphorous analysis for samples and blanks for particulate testing in Phases 3 and 4.

| Phase                     | Particle type      | Round | Sample (Digestion time) | Pb (µg/L) | Al (µg/L) | Fe (µg/L) | Mn (µg/L) | Ni (µg/L) | Cu (µg/L) | Zn (µg/L) | Sn (µg/L) | P (µg/L) | Total particle mass added (mg/L) | Total recovered particle mass (mg/L)* | % recovered |
|---------------------------|--------------------|-------|-------------------------|-----------|-----------|-----------|-----------|-----------|-----------|-----------|-----------|----------|----------------------------------|---------------------------------------|-------------|
| Phase 3: Particulate Lead | Blank              | 1     | Dissolved               | 0.4       | <10.0     | 1,609.4   | 22.0      | 4.7       | 40.7      | 9.1       | 0.1       | 973.2    | -                                | -                                     | -           |
|                           |                    |       | Total                   | 0.6       | <10.0     | 8.1       | 0.6       | 0.5       | 33.6      | 8.9       | 0.1       | 983.8    | -                                | -                                     | -           |
|                           | Pb                 | 1     | Dissolved (1 hr)        | 1.5       | <10.0     | <5.0      | 0.1       | 0.4       | 10.2      | 2.3       | <0.1      | 1,065.5  | 5.8                              | <0.02                                 | <0.5%       |
|                           |                    |       | Dissolved (24 hr)       | 4.7       | 10.8      | <5.0      | 0.1       | 0.4       | 9.7       | 2.3       | <0.1      | 1,028.8  |                                  | <0.02                                 | <0.5%       |
|                           |                    |       | Total                   | 5,231.8   | 11.5      | 18.5      | 0.2       | 0.4       | 18.4      | 4.6       | 0.2       | 1,223.9  |                                  | 5.4                                   | 94%         |
|                           |                    | 2     | Dissolved               | 1.3       | <10.0     | <5.0      | 0.5       | 0.5       | 32.7      | 9.0       | <0.1      | 1,004.0  | 4.9                              | 0.04                                  | 0.9%        |
|                           |                    |       | Total                   | 4,391.5   | 22.9      | 25.5      | 0.6       | 0.5       | 44.2      | 9.7       | 0.3       | 1,030.6  |                                  | 4.5                                   | 92%         |
|                           |                    |       |                         |           |           |           |           |           |           |           |           |          |                                  |                                       |             |
|                           | Al-Pb-1            | 1     | Dissolved (1 hr)        | 0.4       | <10.0     | 16.9      | 0.3       | 0.4       | 8.5       | 1.6       | <0.1      | 1,024.8  | 5.6                              | 0.03                                  | 0.6%        |
|                           |                    |       | Dissolved (24 hr)       | 1.1       | 12.7      | <5.0      | 0.1       | 0.4       | 7.7       | 2.1       | <0.1      | 1,043.9  |                                  | 0.05                                  | 0.8%        |
|                           |                    |       | Total                   | 508.0     | 1,025.5   | 174.7     | 22.0      | 1.4       | 13.4      | 3.3       | 0.2       | 1,456.1  |                                  | 2.2                                   | 39%         |
|                           |                    | 2     | Dissolved               | 0.5       | <10.0     | 11.9      | 0.6       | 0.5       | 30.5      | 9.0       | <0.1      | 974.9    | 5.2                              | 0.0                                   | 1%          |
|                           |                    |       | Total                   | 495.9     | 790.6     | 177.2     | 20.7      | 1.9       | 36.0      | 8.5       | 0.3       | 1,227.9  |                                  | 1.8                                   | 34%         |
|                           |                    |       |                         |           |           |           |           |           |           |           |           |          |                                  |                                       |             |
|                           | Zn-Fe              | 1     | Dissolved (1 hr)        | 0.5       | <10.0     | 8.4       | 0.2       | 0.4       | 9.4       | 4.9       | <0.1      | 1,033.9  | 5.2                              | 0.03                                  | 0.5%        |
|                           |                    |       | Dissolved (24 hr)       | 0.3       | 11.6      | <5.0      | 0.1       | 0.3       | 8.6       | 7.2       | <0.1      | 1,033.6  |                                  | 0.03                                  | 0.5%        |
|                           |                    |       | Total                   | 22.6      | 300.7     | 327.3     | 3.7       | 0.7       | 16.6      | 845.4     | 0.2       | 1,266.7  |                                  | 1.8                                   | 34%         |
|                           |                    | 2     | Dissolved               | 0.4       | <10.0     | 44.1      | 0.9       | 0.6       | 32.3      | 10.5      | <0.1      | 1,009.9  | 5.3                              | 0.09                                  | 2%          |
|                           |                    |       | Total                   | 15.0      | 249.0     | 269.1     | 4.2       | 0.8       | 38.8      | 622.8     | 0.2       | 1,059.9  |                                  | 1.3                                   | 24%         |
|                           |                    |       |                         |           |           |           |           |           |           |           |           |          |                                  |                                       |             |
|                           | Fe-PO <sub>4</sub> | 1     | Dissolved               | 2.8       | 21.7      | <5.0      | 0.4       | 2.3       | 5.0       | 6.7       | 0.3       | 305.5    | -                                | -                                     | -           |
|                           |                    |       | Total                   | 37.3      | 79.5      | 120.2     | 3.1       | 4.8       | 19.8      | 17.6      | 1.3       | 376.3    |                                  | -                                     | -           |
|                           | Blank              | 2     | Dissolved (<30 min)     | 0.5       | <10.0     | <5.0      | 0.1       | 0.4       | 8.7       | 2.1       | <0.1      | 1,002.7  | -                                | -                                     | -           |
|                           |                    |       | Dissolved (1 hr)        | 0.3       | <10.0     | <5.0      | 0.1       | 0.4       | 9.8       | 2.6       | <0.1      | 1,054.5  |                                  | -                                     | -           |
|                           |                    |       | Dissolved (24 hr)       | 0.2       | 11.1      | <5.0      | 0.1       | 0.4       | 8.5       | 2.2       | <0.1      | 1,053.9  |                                  | -                                     | -           |
|                           |                    |       | Total                   | 0.4       | <10.0     | 17.7      | 0.2       | 0.5       | 12.6      | 2.3       | 0.1       | 1,186.9  |                                  | -                                     | -           |
|                           | Pb-Sn              | 1     | Dissolved (<30 min)     | 33.7      | <10.0     | <5.0      | <0.1      | 0.5       | 4.5       | <1.0      | 0.1       | 912.6    | 5.2                              | 0.04                                  | 0.9%        |
|                           |                    |       | Dissolved (1 hr)        | 27.4      | <10.0     | <5.0      | <0.1      | 0.5       | 4.5       | <1.0      | <0.1      | 882.4    |                                  | <0.02                                 | <0.5%       |
|                           |                    |       | Dissolved (24 hr)       | 9.7       | 11.7      | <5.0      | <0.1      | 0.5       | 6.7       | <1.0      | 0.2       | 819.7    |                                  | <0.02                                 | <0.5%       |
|                           |                    |       | Total                   | 2,041.8   | <10.0     | 30.9      | 0.3       | 1.0       | 188.8     | 17.9      | 480.2     | 1,078.9  |                                  | 2.9                                   | 56%         |
|                           | Al-Pb-2            | 1     | Dissolved (<30 min)     | 0.4       | <10.0     | <5.0      | 0.1       | 0.4       | 8.8       | 2.1       | <0.1      | 1,086.6  | 5.2                              | <0.02                                 | <0.5%       |
|                           |                    |       | Dissolved (1 hr)        | 0.5       | <10.0     | <5.0      | <0.1      | 0.4       | 8.7       | 1.8       | <0.1      | 1,065.0  |                                  | <0.02                                 | <0.5%       |
|                           |                    |       | Dissolved (24 hr)       | 1.3       | 12.0      | <5.0      | 0.1       | 0.4       | 8.0       | 1.9       | <0.1      | 1,041.6  |                                  | <0.02                                 | <0.5%       |
|                           |                    |       | Total                   | 292.0     | 644.0     | 107.9     | 13.9      | 3.0       | 42.1      | 24.6      | 0.7       | 1,362.1  |                                  | 1.4                                   | 27%         |

|                                  |         |   |                     |         |       |       |      |     |       |       |       |         |     |       |       |
|----------------------------------|---------|---|---------------------|---------|-------|-------|------|-----|-------|-------|-------|---------|-----|-------|-------|
|                                  | Pb-Fe   | 1 | Dissolved (<30 min) | 15.5    | <10.0 | <5.0  | 0.1  | 0.5 | 8.5   | 2.0   | <0.1  | 1,055.2 | 5.4 | 0.03  | 0.6%  |
|                                  |         |   | Dissolved (1 hr)    | 19.4    | <10.0 | <5.0  | 0.1  | 0.5 | 8.6   | 2.0   | <0.1  | 1,079.0 |     | 0.1   | 1%    |
|                                  |         |   | Dissolved (24 hr)   | 25.6    | 15.5  | <5.0  | <0.1 | 0.5 | 7.3   | 1.5   | <0.1  | 1,015.5 |     | <0.02 | <0.5% |
|                                  |         |   | Total               | 2,302.5 | 185.1 | 475.0 | 47.5 | 1.3 | 111.1 | 19.0  | 9.8   | 1,315.4 |     | 3.4   | 63%   |
| Phase 4: Lemon Juice Dissolution | Blank   | 1 | Dissolved (1 hr)    | 0.5     | <10.0 | 28.2  | 7.4  | 1.0 | 38.8  | 32.9  | <0.1  | 4,076.5 | -   | -     | -     |
|                                  |         |   | Dissolved (24 hr)   | 1.3     | <10.0 | 34.7  | 7.6  | 1.1 | 40.2  | 39.6  | 0.5   | 4,013.2 |     | -     | -     |
|                                  |         |   | Total               | 0.6     | <10.0 | 32.4  | 7.1  | 1.0 | 40.6  | 23.5  | 0.1   | 4,129.2 |     | -     | -     |
|                                  | Pb      | 1 | Dissolved (1 hr)    | 608.2   | 12.6  | 30.8  | 7.7  | 1.7 | 42.3  | 193.0 | 0.2   | 4,051.7 | 5.0 | 0.9   | 18%   |
|                                  |         |   | Dissolved (24 hr)   | 2,782.3 | 12.9  | 34.2  | 7.6  | 1.1 | 45.8  | 39.3  | 0.4   | 4,058.1 |     | 2.9   | 59%   |
|                                  |         |   | Total               | 4,466.9 | <10.0 | 37.3  | 7.0  | 1.0 | 45.4  | 26.4  | <0.1  | 4,294.2 |     | 4.8   | 97%   |
|                                  | Al-Pb-1 | 1 | Dissolved (1 hr)    | 70.0    | <10.0 | 31.1  | 8.2  | 1.1 | 40.9  | 42.5  | <0.1  | 4,262.9 | 4.8 | 0.2   | 4%    |
|                                  |         |   | Dissolved (24 hr)   | 385.2   | 235.9 | 46.8  | 18.1 | 1.2 | 43.8  | 39.2  | 0.5   | 4,130.3 |     | 0.6   | 13%   |
|                                  |         |   | Total               | 501.1   | 869.2 | 196.7 | 30.8 | 1.9 | 40.8  | 23.5  | <0.1  | 4,684.0 |     | 2.1   | 43%   |
|                                  | Zn-Fe   | 1 | Dissolved (1 hr)    | 3.0     | 36.6  | 40.4  | 7.6  | 1.0 | 41.5  | 201.7 | 0.2   | 3,815.7 | 5.2 | 0.3   | 6%    |
|                                  |         |   | Dissolved (24 hr)   | 13.0    | 235.0 | 153.3 | 9.8  | 1.4 | 50.0  | 650.3 | 0.4   | 3,946.0 |     | 1.2   | 24%   |
|                                  |         |   | Total               | 14.4    | 241.6 | 260.3 | 9.7  | 1.4 | 44.2  | 651.5 | <0.1  | 4,431.3 |     | 1.8   | 35%   |
|                                  | Fe-PO4  | 1 | Dissolved (1 hr)    | 34.0    | 48.7  | 77.7  | 11.6 | 2.1 | 28.6  | 53.8  | 0.7   | 4,352.3 | -   | -     | -     |
|                                  |         |   | Dissolved (24 hr)   | 35.4    | 57.7  | 108.5 | 12.1 | 2.2 | 38.8  | 56.6  | 2.8   | 4,316.7 |     | -     | -     |
|                                  |         |   | Total               | 35.7    | 89.4  | 164.7 | 12.2 | 2.4 | 31.3  | 51.9  | 2.5   | 5,278.2 |     | -     | -     |
|                                  | Pb-Sn   | 1 | Dissolved (1 hr)    | 1,460.2 | <10.0 | 30.1  | 6.7  | 1.3 | 86.4  | 35.3  | 72.2  | 4,526.5 | 5.0 | 1.7   | 34%   |
|                                  |         |   | Dissolved (24 hr)   | 1,698.9 | 13.4  | 24.3  | 6.7  | 1.5 | 109.1 | 38.6  | 188.3 | 4,252.6 |     | 1.8   | 36%   |
|                                  |         |   | Total               | 1,781.3 | 14.3  | 91.7  | 8.2  | 1.8 | 204.9 | 34.0  | 166.3 | 5,143.0 |     | 2.9   | 58%   |
|                                  | Al-Pb-2 | 1 | Dissolved (1 hr)    | 36.5    | 22.9  | 32.6  | 7.6  | 1.0 | 21.7  | 26.9  | 0.4   | 4,385.8 | 5.4 | 0.1   | 3%    |
|                                  |         |   | Dissolved (24 hr)   | 172.9   | 331.1 | 63.4  | 12.3 | 2.4 | 41.1  | 33.2  | 0.8   | 4,313.3 |     | 0.6   | 11%   |
|                                  |         |   | Total               | 228.1   | 680.9 | 274.4 | 20.3 | 3.4 | 50.9  | 36.2  | 1.2   | 5,517.9 |     | 2.4   | 45%   |
|                                  | Pb-Fe   | 1 | Dissolved (1 hr)    | 869.6   | 50.6  | 67.2  | 19.7 | 1.1 | 70.1  | 28.8  | 1.2   | 4,430.1 | 5.2 | 1.1   | 21%   |
|                                  |         |   | Dissolved (24 hr)   | 1,770.2 | 117.8 | 260.6 | 39.7 | 1.3 | 99.5  | 29.9  | 1.6   | 4,656.8 |     | 2.5   | 49%   |
|                                  |         |   | Total               | 2,278.2 | 153.3 | 412.6 | 46.1 | 1.5 | 114.3 | 26.3  | 2.8   | 5,511.3 |     | 4.1   | 79%   |
| Phase 4: Vinegar Dissolution     | Blank   | 1 | Dissolved (1 hr)    | 0.6     | <10.0 | <5.0  | 0.9  | 0.9 | 33.6  | 19.3  | <0.1  | 2,873.0 | -   | -     | -     |
|                                  |         |   | Dissolved (24 hr)   | 1.5     | <10.0 | 7.5   | 0.9  | 0.9 | 48.0  | 24.5  | 0.4   | 2,688.2 |     | -     | -     |
|                                  |         |   | Total               | 0.6     | 13.0  | <5.0  | 0.8  | 0.8 | 32.1  | 12.0  | 0.1   | 2,656.4 |     | -     | -     |
|                                  | Pb      | 1 | Dissolved (1 hr)    | 435.1   | <10.0 | 12.2  | 1.0  | 1.1 | 34.2  | 25.8  | <0.1  | 2,748.7 | 5.2 | 0.5   | 10%   |
|                                  |         |   | Dissolved (24 hr)   | 1,111.3 | <10.0 | <5.0  | 0.9  | 0.9 | 32.7  | 22.9  | 0.4   | 2,571.5 |     | 1.0   | 19%   |
|                                  |         |   | Total               | 4,733.4 | <10.0 | 52.4  | 1.4  | 0.9 | 42.5  | 16.5  | 6.3   | 2,488.4 |     | 4.6   | 88%   |
|                                  | Al-Pb-1 | 1 | Dissolved (1 hr)    | 73.4    | <10.0 | 471.2 | 5.2  | 1.5 | 34.2  | 23.5  | 0.1   | 2,666.8 | 5.0 | 0.6   | 12%   |
|                                  |         |   | Dissolved (24 hr)   | 308.0   | 44.1  | 8.3   | 1.4  | 0.9 | 32.5  | 21.1  | 0.3   | 2,454.8 |     | 0.2   | 4%    |

|  |                    |   |                   |         |       |       |      |     |       |       |       |         |     |      |     |
|--|--------------------|---|-------------------|---------|-------|-------|------|-----|-------|-------|-------|---------|-----|------|-----|
|  |                    |   | Total             | 591.0   | 979.3 | 199.7 | 28.5 | 1.8 | 31.7  | 10.4  | 0.5   | 2,769.0 |     | 1.9  | 39% |
|  | Zn-Fe              | 1 | Dissolved (1 hr)  | 0.9     | <10.0 | 5.6   | 0.9  | 0.8 | 30.4  | 112.0 | <0.1  | 2,639.9 | 5.0 | 0.2  | 3%  |
|  |                    |   | Dissolved (24 hr) | 4.9     | 48.4  | 7.0   | 1.4  | 1.0 | 33.5  | 491.7 | 0.6   | 2,762.5 |     | 0.7  | 14% |
|  |                    |   | Total             | 17.1    | 222.8 | 338.1 | 3.1  | 1.8 | 35.5  | 671.6 | 0.3   | 2,608.4 |     | 1.3  | 25% |
|  | Fe-PO <sub>4</sub> | 1 | Dissolved (1 hr)  | 31.7    | 49.7  | 28.4  | 2.1  | 2.3 | 14.2  | 25.3  | 0.5   | 2,790.1 | -   | -    | -   |
|  |                    |   | Dissolved (24 hr) | 31.4    | 54.8  | 46.0  | 2.7  | 1.6 | 15.6  | 34.3  | 0.7   | 2,599.6 | -   | -    | -   |
|  |                    |   | Total             | 34.4    | 67.8  | 279.1 | 5.1  | 2.0 | 17.8  | 29.1  | 1.1   | 2,600.3 | -   | -    | -   |
|  | Pb-Sn              | 1 | Dissolved (1 hr)  | 423.8   | <10.0 | <5.0  | 0.7  | 0.6 | 48.2  | 13.7  | 0.6   | 2,895.9 | 5.2 | 0.5  | 10% |
|  |                    |   | Dissolved (24 hr) | 493.8   | 14.0  | 31.7  | 1.1  | 0.6 | 65.0  | 11.0  | 2.4   | 3,033.4 |     | 0.8  | 15% |
|  |                    |   | Total             | 598.9   | <10.0 | 25.7  | 0.8  | 0.7 | 77.2  | 7.6   | 186.1 | 3,400.1 |     | 1.4  | 27% |
|  | Al-Pb-2            | 1 | Dissolved (1 hr)  | 29.8    | <10.0 | <5.0  | 0.7  | 0.5 | 10.9  | 12.8  | 0.1   | 2,887.6 | 5.8 | 0.06 | 1%  |
|  |                    |   | Dissolved (24 hr) | 201.3   | 43.2  | <5.0  | 1.4  | 0.8 | 15.6  | 14.2  | 0.1   | 3,060.6 |     | 0.5  | 8%  |
|  |                    |   | Total             | 492.6   | 597.3 | 106.1 | 23.9 | 2.9 | 41.8  | 25.2  | 0.6   | 3,396.5 |     | 1.8  | 31% |
|  | Pb-Fe              | 1 | Dissolved (1 hr)  | 492.7   | 21.2  | 13.5  | 1.2  | 0.6 | 35.8  | 15.5  | <0.1  | 2,980.0 | 4.8 | 0.6  | 12% |
|  |                    |   | Dissolved (24 hr) | 926.5   | 66.4  | 8.8   | 3.6  | 0.7 | 64.3  | 14.3  | 0.1   | 3,014.4 |     | 1.1  | 23% |
|  |                    |   | Total             | 1,920.4 | 144.3 | 380.1 | 39.0 | 1.1 | 101.0 | 14.0  | 3.7   | 3,413.8 |     | 3.0  | 63% |

Pb: lead; Al: aluminum; Fe: iron; Mn: manganese; Ni: nickel; Cu: copper; Zn: zinc; Sn: tin; P: phosphorous; PO<sub>4</sub>: phosphate

– denotes values not calculated because no particles were added to these samples (blank or particles collected in water)

\*Calculated using the difference between sample phosphorous concentration and initial dissolved phosphorous (earliest filtered phosphorous value) to differentiate phosphorous in particle form from dissolved phosphorous added in water

Table S3. Characterization from one sample of finished drinking water from the Kankakee River

| Parameter                               | Concentration |
|-----------------------------------------|---------------|
| Alkalinity (mg/L as CaCO <sub>3</sub> ) | 50.2          |
| Cl (mg/L)                               | 33.3          |
| S (mg/L)                                | 70.8          |
| Pb (µg/L)                               | 3.4           |
| Al (µg/L)                               | <10.0         |
| Fe (µg/L)                               | 269.5         |
| Mn (µg/L)                               | 2.4           |
| Ni (µg/L)                               | 1.8           |
| Cu (µg/L)                               | 130.9         |
| Zn (µg/L)                               | 39.4          |
| Sn (µg/L)                               | 1.8           |
| P (µg/L)                                | <5.0          |

CaCO<sub>3</sub>: calcium carbonate; Cl: chloride; S: sulfur; Pb: lead; Al: aluminum; Fe: iron; Mn: manganese; Ni: nickel; Cu: copper; Zn: zinc; Sn: tin; P: phosphorous

Table S4. Metals and phosphorous analysis for samples and blanks in Phases 1 and 2

|          | Test kits             | Sample                | Sample treatment* | Pb (µg/L) | Al (µg/L) | Fe (µg/L) | Mn (µg/L) | Ni (µg/L) | Cu (µg/L) | Zn (µg/L) | Sn (µg/L) | P (µg/L) |
|----------|-----------------------|-----------------------|-------------------|-----------|-----------|-----------|-----------|-----------|-----------|-----------|-----------|----------|
| Phase 1  | B1-B2, V, C1-C11, BC1 | Blank                 | Dissolved         | 0.4       | 72.9      | 5.5       | 2.8       | 5.2       | 11.9      | 10.3      | <0.1      | 6.2      |
|          |                       |                       | Total             | 0.7       | 45.0      | 7.0       | 3.0       | 1.3       | 16.3      | 5.9       | 0.4       | 12.1     |
|          |                       | 150 µg/L dissolved Pb | Dissolved         | 148.8     | 69.8      | 5.6       | 1.8       | 0.6       | 14.9      | 10.0      | <0.1      | 5.1      |
|          |                       |                       | Total             | 171.4     | 15.1      | 8.5       | 3.0       | 0.6       | 18.6      | 7.3       | 0.2       | 22.9     |
|          | B3                    | Blank                 | Dissolved         | 0.4       | < 10.0    | <5.0      | 2.5       | 0.6       | 23.9      | 8.3       | <0.1      | <5.0     |
|          |                       |                       | Total             | 0.5       | <10.0     | <5.0      | 2.7       | 0.6       | 30.0      | 7.1       | 0.1       | <5.0     |
|          |                       | 150 µg/L dissolved Pb | Dissolved         | 154.7     | <10.0     | <5.0      | 2.6       | 0.6       | 26.4      | 6.0       | <0.1      | <5.0     |
|          |                       |                       | Total             | 166.4     | <10.0     | <5.0      | 2.7       | 0.6       | 28.8      | 6.0       | <0.1      | 151.3    |
| Phase 2A | B1-B2, V              | Blank                 | Dissolved         | 0.4       | <10.0     | <5.0      | 2.5       | 0.3       | 18.8      | 13.3      | 0.1       | <5.0     |
|          |                       |                       | Total             | 0.5       | <10.0     | <5.0      | 2.8       | 0.2       | 24.5      | 9.4       | 0.1       | 8.7      |
|          |                       | 10 µg/L dissolved Pb  | Dissolved         | 8.0       | <10.0     | <5.0      | 2.5       | 0.1       | 20.0      | 9.5       | <0.1      | <5.0     |
|          |                       |                       | Total             | 9.5       | <10.0     | <5.0      | 2.7       | 0.1       | 24.1      | 7.3       | 0.1       | <5.0     |
|          |                       | 20 µg/L dissolved Pb  | Dissolved         | 16.3      | <10.0     | <5.0      | 2.5       | 0.2       | 19.7      | 10.8      | <0.1      | <5.0     |
|          |                       |                       | Total             | 18.2      | 223.7     | <5.0      | 2.8       | 0.4       | 23.2      | 8.1       | 0.1       | 5.9      |
|          | B3                    | Blank                 | Dissolved         | 0.2       | <10.0     | 6.7       | 1.8       | 0.6       | 13.2      | 4.5       | <0.1      | <5.0     |
|          |                       |                       | Total             | 0.4       | <10.0     | 30.8      | 2.2       | 0.6       | 15.2      | 3.1       | 0.1       | 71.2     |
|          | B1- B3, V             | 5 µg/L dissolved Pb   | Dissolved         | 4.4       | <10.0     | 21.7      | 2.2       | 0.5       | 14.7      | 3.4       | <0.1      | <5.0     |
|          |                       |                       | Total             | 5.0       | <10.0     | <5.0      | 2.0       | 0.5       | 16.5      | 4.3       | 0.1       | 76.6     |
|          | B3                    | 10 µg/L dissolved Pb  | Dissolved         | 9.1       | <10.0     | 145.6     | 19.4      | 0.9       | 16.3      | 3.0       | <0.1      | <5.0     |
|          |                       |                       | Total             | 9.8       | <10.0     | <5.0      | 23.1      | 0.5       | 16.5      | 2.3       | <0.1      | 113.0    |
|          |                       | 20 µg/L dissolved Pb  | Dissolved         | 18.0      | <10.0     | 17.7      | 2.9       | 0.6       | 14.4      | 2.7       | <0.1      | <5.0     |
|          |                       |                       | Total             | 19.6      | <10.0     | 134.5     | 3.8       | 0.9       | 17.0      | 2.4       | <0.1      | 125.5    |
| Phase 2B | C1-C11BC1             | Blank                 | Dissolved         | 0.4       | <10.0     | <5.0      | 2.5       | 0.3       | 18.8      | 13.3      | 0.1       | <5.0     |
|          |                       |                       | Total             | 0.5       | <10.0     | <5.0      | 2.8       | 0.2       | 24.5      | 9.4       | 0.1       | 8.7      |
|          |                       | Lead Solder           | Dissolved         | 8.6       | <10.0     | <5.0      | 2.8       | 0.2       | 18.6      | 9.5       | 0.5       | <5.0     |
|          |                       |                       | Total             | 50,781.1  | <10.0     | 146.7     | 3.7       | 1.4       | 28.2      | 9.1       | NA        | <5.0     |

Test kits include the vial test (V), 11 color strips (C1-C11), the binary color test (BC1) and three binary strips (B1-B3).

– denotes values not analyzed for that sample.

Pb: lead; Al: aluminum; Fe: iron; Mn: manganese; Ni: nickel; Cu: copper; Zn: zinc; Sn: tin; P: phosphorous

\*Digestion for dissolved lead samples was for >16 hours, but for 1 week for total recovered samples

NA: Not analyzed

Table S5. Lead measurements reported by participants for test kits during Phase 1

| Kit type | Participant | Lead sample          |            |             |           |            | Blank sample         |            |             |           |            |
|----------|-------------|----------------------|------------|-------------|-----------|------------|----------------------|------------|-------------|-----------|------------|
|          |             | Measured lead (mg/L) | Min (mg/L) | Mean (mg/L) | SD (mg/L) | Max (mg/L) | Measured lead (mg/L) | Min (mg/L) | Mean (mg/L) | SD (mg/L) | Max (mg/L) |
| V        | 1           | 0.10 ± <0.01         | 0.05       | 0.12        | 0.05      | 0.20       | 0.10                 | 0.01       | 0.09        | 0.07      | 0.20       |
|          | 2           | 0.07 ± 0.03          |            |             |           |            | 0.01                 |            |             |           |            |
|          | 3           | 0.10 ± <0.01         |            |             |           |            | 0.05                 |            |             |           |            |
|          | 4           | 0.10 ± <0.01         |            |             |           |            | 0.10                 |            |             |           |            |
|          | 5           | 0.20 ± <0.01         |            |             |           |            | 0.20                 |            |             |           |            |
|          | 6           | 0.17 ± 0.06          |            |             |           |            | 0.05                 |            |             |           |            |
| C1       | 1           | 20 ± <1              | 0          | 24          | 10        | 50         | 20                   | 20         | 30          | 15        | 50         |
|          | 2           | 20 ± <1              |            |             |           |            | 20                   |            |             |           |            |
|          | 3           | 20 ± <1              |            |             |           |            | 20                   |            |             |           |            |
|          | 4           | 40 ± 17              |            |             |           |            | 50                   |            |             |           |            |
|          | 5           | 30 ± 17              |            |             |           |            | 50                   |            |             |           |            |
|          | 6           | 13 ± 12              |            |             |           |            | 20                   |            |             |           |            |
| C2       | 1           | 0 ± <1               | 0          | 2           | 4         | 10         | 0                    | 0          | 2           | 4         | 10         |
|          | 2           | 10 ± <1              |            |             |           |            | 10                   |            |             |           |            |
|          | 3           | 0 ± <1               |            |             |           |            | 0                    |            |             |           |            |
|          | 4           | 0 ± <1               |            |             |           |            | 0                    |            |             |           |            |
|          | 5           | 0 ± <1               |            |             |           |            | 0                    |            |             |           |            |
|          | 6           | 0 ± <1               |            |             |           |            | 0                    |            |             |           |            |
| C3       | 1           | 0 ± <1               | 0          | 4           | 8         | 20         | 0                    | 0          | 0           | 0         | 0          |
|          | 2           | 7 ± 12               |            |             |           |            | 0                    |            |             |           |            |
|          | 3           | 0 ± <1               |            |             |           |            | 0                    |            |             |           |            |
|          | 4           | 0 ± <1               |            |             |           |            | 0                    |            |             |           |            |
|          | 5           | 20 ± <1              |            |             |           |            | 0                    |            |             |           |            |
|          | 6           | 0 ± <1               |            |             |           |            | 0                    |            |             |           |            |
| C4       | 1           | 50 ± <1              | 20         | 45          | 12        | 50         | 50                   | 20         | 45          | 12        | 50         |
|          | 2           | 50 ± <1              |            |             |           |            | 50                   |            |             |           |            |
|          | 3           | 50 ± <1              |            |             |           |            | 50                   |            |             |           |            |
|          | 4           | 20 ± <1              |            |             |           |            | 20                   |            |             |           |            |
|          | 5           | 50 ± <1              |            |             |           |            | 50                   |            |             |           |            |
|          | 6           | 50 ± <1              |            |             |           |            | 50                   |            |             |           |            |
| C5       | 1           | 0 ± <1               | 0          | 0           | 0         | 0          | 0                    | 0          | 0           | 0         | 0          |
|          | 2           | 0 ± <1               |            |             |           |            | 0                    |            |             |           |            |
|          | 3           | 0 ± <1               |            |             |           |            | 0                    |            |             |           |            |
|          | 4           | 0 ± <1               |            |             |           |            | 0                    |            |             |           |            |
|          | 5           | 0 ± <1               |            |             |           |            | 0                    |            |             |           |            |
|          | 6           | 0 ± <1               |            |             |           |            | 0                    |            |             |           |            |
| C6       | 1           | 0 ± <1               | 0          | 0           | 0         | 0          | 0                    | 0          | 0           | 0         | 0          |
|          | 2           | 0 ± <1               |            |             |           |            | 0                    |            |             |           |            |
|          | 3           | 0 ± <1               |            |             |           |            | 0                    |            |             |           |            |
|          | 4           | 0 ± <1               |            |             |           |            | 0                    |            |             |           |            |
|          | 5           | 0 ± <1               |            |             |           |            | 0                    |            |             |           |            |
|          | 6           | 0 ± <1               |            |             |           |            | 0                    |            |             |           |            |
| C7       | 1           | 0 ± <1               | 0          | 7           | 9         | 20         | 0                    | 0          | 4           | 9         | 20         |
|          | 2           | 0 ± <1               |            |             |           |            | 0                    |            |             |           |            |
|          | 3           | 0 ± <1               |            |             |           |            | 0                    |            |             |           |            |
|          | 4           | 20 ± <1              |            |             |           |            | 20                   |            |             |           |            |
|          | 5           | 13 ± <12             |            |             |           |            | 0                    |            |             |           |            |
| C8       | 1           | 20 ± <1              | 0          | 12          | 11        | 20         | 20                   | 0          | 12          | 11        | 20         |
|          | 2           | 20 ± <1              |            |             |           |            | 20                   |            |             |           |            |
|          | 3           | 0 ± <1               |            |             |           |            | 0                    |            |             |           |            |
|          | 4           | 0 ± <1               |            |             |           |            | 0                    |            |             |           |            |
|          | 5           | 20 ± <1              |            |             |           |            | 20                   |            |             |           |            |
| C9       | 1           | 0 ± <1               | 0          | 5           | 9         | 20         | 0                    | 0          | 4           | 9         | 20         |

|     |   |              |   |   |   |    |    |   |   |   |   |
|-----|---|--------------|---|---|---|----|----|---|---|---|---|
|     | 2 | $0 \pm <1$   |   |   |   |    | 0  |   |   |   |   |
|     | 3 | $20 \pm <1$  |   |   |   |    | 20 |   |   |   |   |
|     | 4 | $7 \pm <12$  |   |   |   |    | 0  |   |   |   |   |
|     | 5 | $0 \pm <1$   |   |   |   |    | 0  |   |   |   |   |
| C10 | 1 | $0 \pm <1$   | 0 | 0 | 0 | 0  | 0  | 0 | 0 | 0 | 0 |
|     | 2 | $0 \pm <1$   |   |   |   |    | 0  |   |   |   |   |
|     | 3 | $0 \pm <1$   |   |   |   |    | 0  |   |   |   |   |
|     | 4 | $0 \pm <1$   |   |   |   |    | 0  |   |   |   |   |
|     | 5 | $0 \pm <1$   |   |   |   |    | 0  |   |   |   |   |
|     | 6 | $0 \pm <1$   |   |   |   |    | 0  |   |   |   |   |
| C11 | 1 | $13 \pm <12$ | 0 | 6 | 9 | 20 | 0  | 0 | 0 | 0 | 0 |
|     | 2 | $0 \pm <1$   |   |   |   |    | 0  |   |   |   |   |
|     | 3 | $20 \pm <1$  |   |   |   |    | 0  |   |   |   |   |
|     | 4 | $0 \pm <1$   |   |   |   |    | 0  |   |   |   |   |
|     | 5 | $0 \pm <1$   |   |   |   |    | 0  |   |   |   |   |
|     | 6 | $0 \pm <1$   |   |   |   |    | 0  |   |   |   |   |

Test kits include the vial test (V) and 11 color strips (C1-C11).SD: standard deviation



Table S6. Size distributions of lead particles determined with Raman atomic force microscopy at a 40x zoom.

| Size                | Pb             |                      | Pb-Sn          |                      | Pb-Fe          |                      | Lead solder    |                      |
|---------------------|----------------|----------------------|----------------|----------------------|----------------|----------------------|----------------|----------------------|
|                     | # of particles | % of total particles | # of particles | % of total particles | # of particles | % of total particles | # of particles | % of total particles |
| 0.5-1 $\mu\text{m}$ | 1593           | 20%                  | 333            | 20%                  | 189            | 22%                  | 707            | 16%                  |
| 1-2 $\mu\text{m}$   | 2488           | 31%                  | 471            | 28%                  | 239            | 28%                  | 1140           | 25%                  |
| 2-5 $\mu\text{m}$   | 2809           | 35%                  | 581            | 35%                  | 265            | 31%                  | 1709           | 38%                  |
| 5-10 $\mu\text{m}$  | 886            | 11%                  | 193            | 12%                  | 95             | 11%                  | 720            | 16%                  |
| 10-15 $\mu\text{m}$ | 211            | 3%                   | 41             | 2%                   | 33             | 4%                   | 132            | 3%                   |
| 15-50 $\mu\text{m}$ | 93             | 1%                   | 38             | 2%                   | 41             | 5%                   | 103            | 2%                   |
| 50+ $\mu\text{m}$   | 21             | 0%                   | 3              | 0%                   | 1              | 0%                   | 40             | 1%                   |
| Total               | 8101           | -                    | 1660           | -                    | 863            | -                    | 4551           | -                    |

Pb: lead; Fe: iron; Sn: tin

Table S7. Size distributions of lead particles determined with Raman atomic force microscopy at a 4x zoom.

| Size                 | Al-Pb-1        |                      | Al-Pb-2        |                      | Zn-Fe          |                      |
|----------------------|----------------|----------------------|----------------|----------------------|----------------|----------------------|
|                      | # of particles | % of total particles | # of particles | % of total particles | # of particles | % of total particles |
| 5-10 $\mu\text{m}$   | 3526           | 38%                  | 6961           | 53%                  | 9913           | 42%                  |
| 10-20 $\mu\text{m}$  | 3371           | 36%                  | 4143           | 32%                  | 8461           | 36%                  |
| 20-40 $\mu\text{m}$  | 1604           | 17%                  | 1813           | 14%                  | 3616           | 15%                  |
| 40-100 $\mu\text{m}$ | 515            | 6%                   | 166            | 1%                   | 1018           | 4%                   |
| 100+ $\mu\text{m}$   | 262            | 3%                   | 60             | 0%                   | 404            | 2%                   |
| Total                | 9,278          | -                    | 13,143         | -                    | 23,412         | -                    |

Pb: lead; Al: aluminum; Fe: iron; Zn: Zinc

Table S8. Particulate lead detection and dissolution when exposed to various corrosion control treatments

| Treatment    | Time    | Water conditions                   | Total lead (µg/L) | Dissolved lead (µg/L) | % improved | # Positive Tests |
|--------------|---------|------------------------------------|-------------------|-----------------------|------------|------------------|
| No Treatment | <30 min | Polyphosphate                      | 243.6             | <b>148.4 (61%)</b>    | -          | 3/3              |
|              |         | Polyphosphate with nitrate         | 689.6             | <b>378.0 (55%)</b>    | -          | 3/3              |
|              |         | Orthophosphate                     | 20.1              | 2.5 (13%)             | -          | 0/3              |
|              |         | Orthophosphate/polyphosphate blend | 17.2              | 4.8 (28%)             | -          | 0/3              |
|              |         | Zinc orthophosphate                | 12.0              | 0.4 (3%)              | -          | 0/3              |
|              |         | Amended Control                    | 706.8             | <b>443.6 (63%)</b>    | -          | 3/3              |
|              |         | Unamended Control                  | 1,347.9           | <b>130.2 (10%)</b>    | -          | 3/3              |
| Lemon Juice  | 24 hr   | Polyphosphate                      | 203.2             | <b>185.5 (91%)</b>    | 30%        | 3/3              |
|              |         | Polyphosphate with nitrate         | 548.9             | <b>521.9 (95%)</b>    | 40%        | 2/3              |
|              |         | Orthophosphate                     | 14.2              | 12.1 (85%)            | 72%        | 0/3              |
|              |         | Orthophosphate/polyphosphate blend | 12.5              | 8.4 (67%)             | 39%        | 0/3              |
|              |         | Zinc orthophosphate                | 2.6               | 2.0 (78%)             | 75%        | 0/3              |
|              |         | Amended Control                    | 574.8             | <b>530.3 (92%)</b>    | 29%        | 3/3              |
|              |         | Unamended Control                  | 425.4             | <b>392.4 (92%)</b>    | 82%        | 3/3              |

- denotes no percent improvement calculated for cases with no treatment

Bold denote dissolved lead >15 µg/L

Table S9. Metals and phosphorous analysis for samples and blanks in Phase 5

|              | Sample                                 | Sample*   | Pb<br>(µg/L) | Al<br>(µg/L) | Fe<br>(µg/L) | Mn<br>(µg/L) | Ni<br>(µg/L) | Cu<br>(µg/L) | Zn<br>(µg/L) | Sn<br>(µg/L) | P<br>(µg/L) |
|--------------|----------------------------------------|-----------|--------------|--------------|--------------|--------------|--------------|--------------|--------------|--------------|-------------|
| No treatment | Polyphosphate                          | Dissolved | 148.4        | 25.0         | <5.0         | 0.2          | 0.8          | 26.9         | 73.4         | 1.0          | 477.8       |
|              |                                        | Total     | 243.6        | 35.8         | 13.2         | 2.2          | 0.8          | 54.4         | 79.5         | 1.9          | 510.6       |
|              | Polyphosphate with nitrate             | Dissolved | 378.0        | 21.2         | <5.0         | 0.2          | 0.7          | 13.6         | 3.3          | 2.2          | 439.6       |
|              |                                        | Total     | 689.6        | 20.3         | 7.3          | 0.3          | 0.8          | 27.9         | 4.7          | 51.3         | 473.1       |
|              | Orthophosphate                         | Dissolved | 2.5          | 21.1         | <5.0         | 0.2          | 0.7          | 71.4         | 123.1        | 0.9          | 931.2       |
|              |                                        | Total     | 20.1         | 22.8         | 6.5          | 0.4          | 0.7          | 126.5        | 135.1        | 4.3          | 978.3       |
|              | Orthophosphate/<br>polyphosphate blend | Dissolved | 4.8          | 21.6         | <5.0         | 0.2          | 0.8          | 145.4        | 159.2        | 0.7          | 1,050.6     |
|              |                                        | Total     | 17.2         | 19.1         | 9.2          | 0.4          | 0.9          | 194.7        | 155.8        | 20.7         | 1,035.2     |
|              | Zinc orthophosphate                    | Dissolved | 0.4          | 21.0         | <5.0         | 0.2          | 0.7          | 56.6         | 451.5        | 0.2          | 915.2       |
|              |                                        | Total     | 12.0         | 32.0         | 6.0          | 0.4          | 0.8          | 96.4         | 512.2        | 1.6          | 980.1       |
|              | Amended Control                        | Dissolved | 443.6        | 22.1         | <5.0         | 0.2          | 1.0          | 25.3         | 12.9         | 4.6          | <5.0        |
|              |                                        | Total     | 706.8        | 21.4         | 18.2         | 0.5          | 1.1          | 46.0         | 14.5         | 130.0        | <5.0        |
| Lemon juice  | Unamended Control                      | Dissolved | 130.2        | 21.6         | <5.0         | 0.2          | 0.7          | 9.4          | 13.9         | 1.7          | <5.0        |
|              |                                        | Total     | 1,347.9      | 20.4         | 11.8         | 0.6          | 1.4          | 65.5         | 100.3        | 3.3          | 10.7        |
|              | Polyphosphate                          | Dissolved | 185.5        | 23.6         | 32.0         | 6.3          | 1.3          | 41.0         | 128.7        | 0.9          | 3,661.9     |
|              |                                        | Total     | 203.2        | 39.5         | 60.7         | 7.6          | 1.5          | 45.3         | 93.5         | 1.1          | 4,141.1     |
|              | Polyphosphate with nitrate             | Dissolved | 521.9        | 26.3         | 34.4         | 6.8          | 1.3          | 27.3         | 31.1         | 18.5         | 3,955.8     |
|              |                                        | Total     | 548.9        | 29.5         | 45.1         | 7.6          | 1.4          | 29.4         | 21.9         | 27.1         | 4,288.3     |
|              | Orthophosphate                         | Dissolved | 12.1         | 26.3         | 38.2         | 6.7          | 1.3          | 104.2        | 148.4        | 2.3          | 4,610.2     |
|              |                                        | Total     | 14.2         | 34.7         | 49.1         | 7.4          | 1.4          | 106.3        | 137.9        | 2.3          | 4,619.9     |
|              | Orthophosphate/<br>polyphosphate blend | Dissolved | 8.4          | 25.2         | 35.7         | 6.5          | 1.4          | 161.9        | 170.7        | 6.5          | 4,358.0     |
|              |                                        | Total     | 12.5         | 34.8         | 49.9         | 7.6          | 1.3          | 180.2        | 169.2        | 8.1          | 4,873.0     |
|              | Zinc orthophosphate                    | Dissolved | 2.0          | 24.2         | 35.0         | 6.4          | 1.3          | 76.3         | 488.3        | 1.1          | 4,247.5     |
|              |                                        | Total     | 2.6          | 36.1         | 51.8         | 7.3          | 1.3          | 82.9         | 486.2        | 1.2          | 4,610.7     |
|              | Amended Control                        | Dissolved | 392.4        | 26.0         | 33.9         | 6.7          | 1.4          | 36.4         | 56.3         | 42.5         | 3,634.2     |
|              |                                        | Total     | 425.4        | 33.0         | 50.8         | 7.7          | 1.4          | 39.6         | 50.0         | 48.7         | 3,803.0     |
|              | Unamended Control                      | Dissolved | 530.3        | 24.1         | 28.8         | 6.6          | 1.5          | 40.8         | 57.9         | 69.9         | 3,250.4     |
|              |                                        | Total     | 574.8        | 27.3         | 93.2         | 7.6          | 1.6          | 43.7         | 35.5         | 54.3         | 3,572.7     |

Pb: lead; Al: aluminum; Fe: iron; Mn: manganese; Ni: nickel; Cu: copper; Zn: zinc; Sn: tin; P: phosphorous

\*Digestion for dissolved lead samples was for 24 hours for both no treatment and lemon juice, but for 1 week for total recovered samples

Table S10. Accuracy, sensitivity, and specificity of binary strips

|              |          | Phases 1 & 2A  |             | Phase 3          |           | Phases 4 & 5                   |             | Phases 1-5  |             |                |             |
|--------------|----------|----------------|-------------|------------------|-----------|--------------------------------|-------------|-------------|-------------|----------------|-------------|
|              |          | Dissolved lead |             | Particulate lead |           | Dissolved and particulate lead |             | Total lead  |             | Dissolved lead |             |
|              |          | >15 µg/L       | <15 µg/L    | >15 µg/L         | <15 µg/L  | >15 µg/L                       | <15 µg/L    | >15 µg/L    | <15 µg/L    | >15 µg/L       | <15 µg/L    |
| Binary Strip | Positive | 18<br>46.2%    | 7<br>17.9%  | 6<br>28.6%       | 0<br>0.0% | 54<br>73.0%                    | 0<br>0.0%   | 78<br>58.2% | 7<br>5.2%   | 78<br>58.2%    | 7<br>5.2%   |
|              | Negative | 0<br>0.0%      | 14<br>35.9% | 15<br>71.4%      | 0<br>0.0% | 8<br>10.8%                     | 12<br>16.2% | 23<br>17.2% | 26<br>19.4% | 2<br>1.5%      | 47<br>35.1% |
| Accuracy     |          | 82.1%          |             | 28.6%            |           | 89.2%                          |             | 77.6%       |             | 93.3%          |             |
| Sensitivity  |          | 100.0%         |             | 28.6%            |           | 87.1%                          |             | 77.2%       |             | 97.5%          |             |
| Specificity  |          | 66.7%          |             | -                |           | 100.0%                         |             | 78.8%       |             | 87.0%          |             |
